# Supplementary material for: The XBP1 Arm of the Unfolded Protein Response Induces Fibrogenic Activity in Hepatic Stellate Cells Through Autophagy
Source: PubMed Central journal article supplement (PMC5172197; doi:10.1038/srep39342), 2016-12-20
Supplement: srep39342-s1.pdf [file srep39342-s1.pdf]

## **Supporting Information**

### **The XBP1 Arm of the Unfolded Protein Response Induces Fibrogenic Activity in Hepatic Stellate Cells Through Autophagy**

Rosa S. Kim, Daisuke Hasegawa, Nicolas Goossens, Takuma Tsuchida, Varinder Athwal, Xiaochen Sun, Christopher L. Robinson, Dipankar Bhattacharya, Hsin-I Chou, David Y. Zhang, Bryan C. Fuchs, Youngmin Lee, Yujin Hoshida, Scott L. Friedman

A

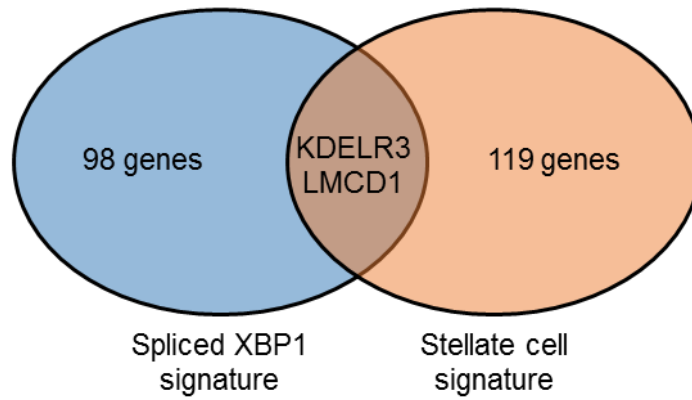

B

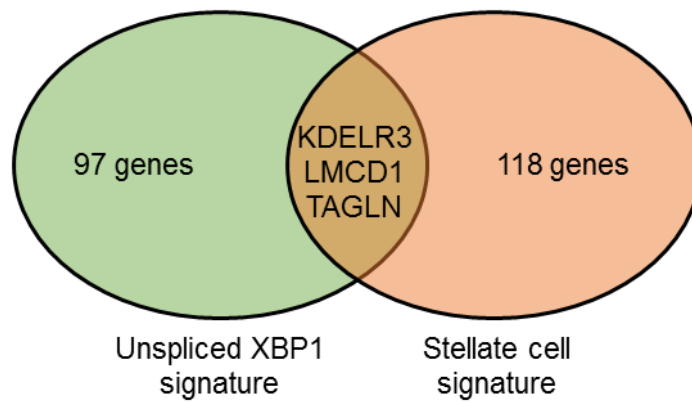

**Supplementary Figure 1**

Overlapped genes between the XBP1 target gene signatures (Supplementary Table 4) and the 122-gene HSC gene signature (Zhang et al., 2016).

(A) Overlap between overexpressed genes by sXBP1 and the HSC gene signature.

(B) Overlap between overexpressed genes by uXBP1 and the HSC gene signature.

**Supplementary Table 1**

Primer sequences used for qPCR.

| <b>Entrez Gene ID</b> | <b>Gene Symbol</b> | <b>Species</b> | <b>Sequence 5' to 3'</b>       | <b>Scale (μmole)</b> |
|-----------------------|--------------------|----------------|--------------------------------|----------------------|
| 2597                  | GAPDH-F            | human          | CAATGACCCCTTCATTGACC           | 0.025                |
| 2597                  | GAPDH-R            | human          | GATCTCGCTCCTGGAAGATG           | 0.025                |
| 1277                  | Col1-F             | human          | GGCTTCCCTGGTCTTCCTGG           | 0.025                |
| 1277                  | Col1-R             | human          | CCAGGGGGTCCAGCCAAT             | 0.025                |
| 59                    | ASMA-F             | human          | AGGCACCCCTGAACCCCAA            | 0.025                |
| 59                    | ASMA-R             | human          | CAGCACCGCCTGGATAGCC            | 0.025                |
| 5159                  | PDGFRB-F           | human          | CCAGAAGCCATCAGCAGCAAG          | 0.025                |
| 5159                  | PDGFRB-R           | human          | AGGCCCTGAGAGATCTGTGG           | 0.025                |
| 7076                  | TIMP1-F            | human          | TGACATCCGGTTCGTCTACA           | 0.025                |
| 7076                  | TIMP1-R            | human          | TGATGTGCAAGAGTCCATCC           | 0.025                |
| 7077                  | TIMP2-F            | human          | AAGCGGTCAGTGAGAAGGAA           | 0.025                |
| 7077                  | TIMP2-R            | human          | GGGGGCCGTGTAGATAAACT           | 0.025                |
| 4313                  | MMP2-F             | human          | CCCCAAGCTCATCGCAGAT            | 0.025                |
| 4313                  | MMP2-R             | human          | GGTCCACGACGGCATCC              | 0.025                |
| 7494                  | XBP1 total-F       | human          | CTGAATCTGAAGAGTCAATACCGCCAGAAT | 0.025                |
| 7494                  | XBP1 total-R       | human          | AGGAGTTAAGACAGCGCTTGGGGATGGAT  | 0.025                |
| 7494                  | XBP1s 436-F        | human          | AACCAGGAGTTAAGACAGCGCTT        | 0.025                |
| 7494                  | XBP1s 569-R        | human          | CTGCACCCTCTGCGGACT             | 0.025                |
| 9695                  | EDEM-F             | human          | TTGACAAAGATTCCACCGTCC          | 0.025                |
| 9695                  | EDEM-R             | human          | TGTGAGCAGAAAGGAGGCTTC          | 0.025                |
| 22433                 | XBP1 total-F       | mouse          | CCTGAGCCCGGAGGAGAA             | 0.025                |
| 22433                 | XBP1 total-R       | mouse          | CTCGAGCAGTCTGCGCTG             | 0.025                |
| 22433                 | XBP1s-F            | mouse          | ACACGCTTGGGAATGGACAC           | 0.025                |
| 22433                 | XBP1s-R            | mouse          | CCATGGGAAGATGTTCTGGG           | 0.025                |
| 192193                | EDEM-F             | mouse          | AAGCCCTCTGGAACCTGCG            | 0.025                |
| 192193                | EDEM-R             | mouse          | AACCCAATGGCCTGTCTGG            | 0.025                |
| 11433                 | GAPDH-F            | mouse          | CCTGCCAAGTATGATGAC             | 0.025                |
| 11433                 | GAPDH-R            | mouse          | GGAGTTGCTGTTGAAGTC             | 0.025                |
| 12842                 | Col1a1-F           | mouse          | GTCCCTGAAGTCAGCTGCATA          | 0.025                |
| 12842                 | Col1a1-R           | mouse          | TGGGACAGTCCAGTTCTTCAT          | 0.025                |
| 11475                 | ASMA-F             | mouse          | TCCTCCCTGGAGAAGAGCTAC          | 0.025                |
| 11475                 | ASMA-R             | mouse          | TATGGTGGTTTCGTGGATGC           | 0.025                |

**Supplementary Table 2**

Antibodies used for Western blotting and immunostaining.

| Protein  | Dilution | Vendor         | Catalog number | Protein Accession # |
|----------|----------|----------------|----------------|---------------------|
| XBP1     | 1:200    | Santa Cruz     | M-186          | Q9R1S4              |
| Collagen | 1:5000   | Rockland       | 600-401-103    | P02453              |
| BIP      | 1:1000   | Cell Signaling | 3177           | P11021              |
| CHOP     | 1:1000   | Cell Signaling | 2895           | P35638              |
| pIRE1    | 1:1000   | Abcam          | ab48187        | O75460              |
| GAPDH    | 1:5000   | Abcam          | ab9482         | P04406              |

**Supplementary Table 3**

Significantly molecular pathways modulated by sXBP1 or uXBP1 overexpression in human HSC lines (FDR&lt;0.05, top 20 gene sets).

(Gene Set Enrichment Analysis)

Click gene set name for detailed annotation.

| Induced in                                | Gene set database                                                                                                                            | Gene set                                                | NES    | p-value | FDR    |
|-------------------------------------------|----------------------------------------------------------------------------------------------------------------------------------------------|---------------------------------------------------------|--------|---------|--------|
| sXBP1                                     | Hallmark<br>(curated transcriptional targets)                                                                                                | <a href="#">UNFOLDED PROTEIN RESPONSE</a>               | 2.44   | <0.001  | <0.001 |
|                                           |                                                                                                                                              | <a href="#">MTORC1 SIGNALING</a>                        | 2.37   | <0.001  | <0.001 |
|                                           |                                                                                                                                              | <a href="#">OXIDATIVE PHOSPHORYLATION</a>               | 2.29   | <0.001  | <0.001 |
|                                           |                                                                                                                                              | <a href="#">MYC TARGETS V1</a>                          | 2.21   | <0.001  | <0.001 |
|                                           |                                                                                                                                              | <a href="#">PROTEIN SECRETION</a>                       | 2.18   | <0.001  | <0.001 |
|                                           |                                                                                                                                              | <a href="#">MYC TARGETS V2</a>                          | 1.84   | <0.001  | 0.001  |
|                                           |                                                                                                                                              | <a href="#">FATTY ACID METABOLISM</a>                   | 1.83   | <0.001  | <0.001 |
|                                           |                                                                                                                                              | <a href="#">GLYCOLYSIS</a>                              | 1.74   | <0.001  | 0.002  |
|                                           |                                                                                                                                              | <a href="#">ADIPOGENESIS</a>                            | 1.58   | <0.001  | 0.008  |
|                                           |                                                                                                                                              | <a href="#">REACTIVE OXIGEN SPECIES PATHWAY</a>         | 1.58   | 0.008   | 0.008  |
|                                           |                                                                                                                                              | <a href="#">XENOBIOTIC METABOLISM</a>                   | 1.57   | <0.001  | 0.007  |
|                                           |                                                                                                                                              | <a href="#">ANDROGEN RESPONSE</a>                       | 1.48   | 0.006   | 0.017  |
|                                           |                                                                                                                                              | <a href="#">CHOLESTEROL HOMEOSTASIS</a>                 | 1.44   | 0.018   | 0.024  |
|                                           | <a href="#">DNA REPAIR</a>                                                                                                                   | 1.42                                                    | 0.010  | 0.027   |        |
|                                           | <a href="#">HYPOXIA</a>                                                                                                                      | 1.41                                                    | 0.004  | 0.029   |        |
|                                           | Reactome<br>(curated pathway members)                                                                                                        | <a href="#">ASPARAGINE N LINKED GLYCOSYLATION</a>       | 2.76   | <0.001  | <0.001 |
|                                           |                                                                                                                                              | <a href="#">METABOLISM OF PROTEINS</a>                  | 2.53   | <0.001  | <0.001 |
|                                           |                                                                                                                                              | <a href="#">POST TRANSLATIONAL PROTEIN MODIFICATION</a> | 2.50   | <0.001  | <0.001 |
|                                           |                                                                                                                                              | <a href="#">ACTIVATION OF CHAPERONE GENES BY XBP1S</a>  | 2.39   | <0.001  | <0.001 |
|                                           |                                                                                                                                              | <a href="#">TRANSLATION</a>                             | 2.36   | <0.001  | <0.001 |
| <a href="#">UNFOLDED PROTEIN RESPONSE</a> |                                                                                                                                              | 2.36                                                    | <0.001 | <0.001  |        |
| <a href="#">DIABETES PATHWAYS</a>         |                                                                                                                                              | 2.34                                                    | <0.001 | <0.001  |        |
|                                           | <a href="#">BIOSYNTHESIS OF THE N GLYCAN PRECURSOR DOLICHOL LI<br/>PID LINKED OLIGOSACCHARIDE LLO AND TRANSFER TO A N<br/>ASCENT PROTEIN</a> | 2.28                                                    | <0.001 | <0.001  |        |
|                                           | <a href="#">SRP DEPENDENT COTRANSLATIONAL PROTEIN TARGETING T<br/>O MEMBRANE</a>                                                             | 2.26                                                    | <0.001 | <0.001  |        |
|                                           | <a href="#">TRANSPORT TO THE GOLGI AND SUBSEQUENT MODIFICATIO<br/>N</a>                                                                      | 2.22                                                    | <0.001 | <0.001  |        |
|                                           | <a href="#">MITOCHONDRIAL PROTEIN IMPORT</a>                                                                                                 | 2.21                                                    | <0.001 | <0.001  |        |
|                                           | <a href="#">MEMBRANE TRAFFICKING</a>                                                                                                         | 2.08                                                    | <0.001 | <0.001  |        |
|                                           | <a href="#">TCA CYCLE AND RESPIRATORY ELECTRON TRANSPORT</a>                                                                                 | 1.96                                                    | <0.001 | 0.002   |        |

|                               |                                   |                                                                   |       |        |        |
|-------------------------------|-----------------------------------|-------------------------------------------------------------------|-------|--------|--------|
|                               |                                   | <a href="#">RESPIRATORY ELECTRON TRANSPORT ATP SYNTHESIS BY C</a> | 1.94  | <0.001 | 0.002  |
|                               |                                   | <a href="#">HEMIOSMOTIC COUPLING AND HEAT PRODUCTION BY UNCO</a>  |       |        |        |
|                               |                                   | <a href="#">UPLING PROTEINS</a>                                   |       |        |        |
|                               |                                   | <a href="#">INCRETIN SYNTHESIS SECRETION AND INACTIVATION</a>     | 1.91  | <0.001 | 0.004  |
|                               |                                   | <a href="#">BRANCHED CHAIN AMINO ACID CATABOLISM</a>              | 1.90  | <0.001 | 0.004  |
|                               |                                   | <a href="#">P53 INDEPENDENT G1 S DNA DAMAGE CHECKPOINT</a>        | 1.85  | <0.001 | 0.008  |
|                               |                                   | <a href="#">SYNTHESIS SECRETION AND INACTIVATION OF GLP1</a>      | 1.83  | 0.002  | 0.011  |
|                               |                                   | <a href="#">CDK MEDIATED PHOSPHORYLATION AND REMOVAL OF CDC6</a>  | 1.82  | <0.001 | 0.013  |
|                               |                                   | <a href="#">RESPIRATORY ELECTRON TRANSPORT</a>                    | 1.82  | <0.001 | 0.013  |
| Transcription factor targets* |                                   | <a href="#">XBP1_01</a>                                           | 2.09  | <0.001 | <0.001 |
|                               |                                   | <a href="#">GABP_B</a>                                            | 1.91  | <0.001 | 0.001  |
|                               |                                   | <a href="#">ATF6_01</a>                                           | 1.87  | <0.001 | 0.001  |
|                               |                                   | <a href="#">ELK1_02</a>                                           | 1.82  | <0.001 | 0.002  |
|                               |                                   | <a href="#">NRF2_01</a>                                           | 1.82  | <0.001 | 0.002  |
|                               |                                   | <a href="#">HTF_01</a>                                            | 1.77  | <0.001 | 0.002  |
|                               |                                   | <a href="#">TGANNYRGCA_TCF11MAFG_01</a>                           | 1.63  | <0.001 | 0.009  |
|                               |                                   | <a href="#">ATF_01</a>                                            | 1.58  | <0.001 | 0.013  |
|                               |                                   | <a href="#">E4F1_Q6</a>                                           | 1.48  | <0.001 | 0.031  |
|                               |                                   | <a href="#">CETS1P54_01</a>                                       | 1.44  | <0.001 | 0.047  |
| Signaling pathway targets**   |                                   | <a href="#">CAMP_UP.V1_UP</a>                                     | 2.02  | <0.001 | <0.001 |
| (MSigDB, C6 category)         |                                   | <a href="#">MTOR_UP.N4.V1_UP</a>                                  | 1.69  | <0.001 | 0.008  |
|                               |                                   | <a href="#">EIF4E_UP</a>                                          | 1.58  | 0.002  | 0.024  |
|                               |                                   | <a href="#">NFE2L2.V2</a>                                         | 1.54  | <0.001 | 0.028  |
|                               |                                   | <a href="#">CSR_LATE_UP.V1_UP</a>                                 | 1.41  | 0.009  | 0.114  |
|                               |                                   | <a href="#">ERB2_UP.V1_UP</a>                                     | 1.39  | 0.006  | 0.103  |
|                               |                                   | <a href="#">MYC_UP.V1_UP</a>                                      | 1.37  | 0.018  | 0.105  |
|                               |                                   | <a href="#">LTE2_UP.V1_UP</a>                                     | 1.33  | 0.021  | 0.142  |
|                               |                                   | <a href="#">PIGF_UP.V1_UP</a>                                     | 1.32  | 0.023  | 0.147  |
|                               |                                   | <a href="#">PDGF_UP.V1_UP</a>                                     | 1.29  | 0.048  | 0.151  |
| Control                       | Hallmark                          | <a href="#">INTERFERON ALPHA RESPONSE</a>                         | -2.56 | <0.001 | <0.001 |
| (vs. sXBP1)                   | (curated transcriptional targets) | <a href="#">INTERFERON GAMMA RESPONSE</a>                         | -2.38 | <0.001 | <0.001 |
|                               |                                   | <a href="#">TNFA_SIGNALING_VIA_NFKB</a>                           | -2.22 | <0.001 | <0.001 |
|                               |                                   | <a href="#">TGF_BETA_SIGNALING</a>                                | -2.10 | <0.001 | <0.001 |
|                               |                                   | <a href="#">APOPTOSIS</a>                                         | -2.04 | <0.001 | <0.001 |
|                               |                                   | <a href="#">P53_PATHWAY</a>                                       | -2.00 | <0.001 | <0.001 |
|                               |                                   | <a href="#">KRAS_SIGNALING_UP</a>                                 | -1.79 | <0.001 | 0.001  |
|                               |                                   | <a href="#">IL6_JAK_STAT3_SIGNALING</a>                           | -1.73 | 0.002  | 0.002  |

|                                                      |                                                                                       |        |        |        |
|------------------------------------------------------|---------------------------------------------------------------------------------------|--------|--------|--------|
| Reactome<br>(curated pathway members)                | <a href="#">INFLAMMATORY RESPONSE</a>                                                 | -1.71  | <0.001 | 0.002  |
|                                                      | <a href="#">IL2_STAT5_SIGNALING</a>                                                   | -1.58  | 0.002  | 0.007  |
|                                                      | <a href="#">COMPLEMENT</a>                                                            | -1.56  | <0.001 | 0.009  |
|                                                      | <a href="#">UV_RESPONSE_DN</a>                                                        | -1.53  | <0.001 | 0.011  |
|                                                      | <a href="#">MITOTIC_SPINDLE</a>                                                       | -1.50  | 0.002  | 0.013  |
|                                                      | <a href="#">APICAL_SURFACE</a>                                                        | -1.46  | 0.033  | 0.019  |
|                                                      | <a href="#">ALLOGRAFT_REJECTION</a>                                                   | -1.43  | 0.008  | 0.026  |
|                                                      | <a href="#">HEDGEHOG_SIGNALING</a>                                                    | -1.40  | 0.054  | 0.030  |
|                                                      | <a href="#">INTERFERON_GAMMA_SIGNALING</a>                                            | -2.24  | <0.001 | <0.001 |
|                                                      | <a href="#">INTERFERON_SIGNALING</a>                                                  | -2.14  | <0.001 | <0.001 |
|                                                      | <a href="#">TRAF6_MEDIATED_IRF7_ACTIVATION</a>                                        | -2.08  | <0.001 | 0.001  |
|                                                      | <a href="#">CYTOKINE_SIGNALING_IN_IMMUNE_SYSTEM</a>                                   | -2.07  | <0.001 | 0.001  |
|                                                      | <a href="#">RIG_I_MDA5_MEDIATED_INDUCTION_OF_IFN_ALPHA_BETA_PATHWAYS</a>              | -2.02  | <0.001 | 0.002  |
|                                                      | <a href="#">FACTORS_INVOLVED_IN_MEGAKARYOCYTE_DEVELOPMENT_AND_PLATELET_PRODUCTION</a> | -2.01  | <0.001 | 0.002  |
|                                                      | <a href="#">CIRCADIAN_CLOCK</a>                                                       | -2.00  | <0.001 | 0.002  |
|                                                      | <a href="#">NEGATIVE_REGULATORS_OF_RIG_I_MDA5_SIGNALING</a>                           | -1.95  | <0.001 | 0.004  |
|                                                      | <a href="#">BMAL1_CLOCK_NPAS2_ACTIVATES_CIRCADIAN_EXPRESSION</a>                      | -1.92  | <0.001 | 0.007  |
|                                                      | <a href="#">DOWNSTREAM_SIGNAL_TRANSDUCTION</a>                                        | -1.91  | <0.001 | 0.007  |
|                                                      | <a href="#">CIRCADIAN_REPRESSION_OF_EXPRESSION_BY_REV_ERBA</a>                        | -1.88  | <0.001 | 0.009  |
|                                                      | <a href="#">INTERFERON_ALPHA_BETA_SIGNALING</a>                                       | -1.87  | <0.001 | 0.011  |
|                                                      | <a href="#">YAP1_AND_WWTR1_TAZ_STIMULATED_GENE_EXPRESSION</a>                         | -1.87  | <0.001 | 0.010  |
|                                                      | <a href="#">NOTCH1_INTRACELLULAR_DOMAIN_REGULATES_TRANSCRIPTION</a>                   | -1.86  | <0.001 | 0.011  |
|                                                      | <a href="#">RORA_ACTIVATES_CIRCADIAN_EXPRESSION</a>                                   | -1.83  | 0.002  | 0.016  |
|                                                      | <a href="#">SIGNALING_BY_FGFR_IN_DISEASE</a>                                          | -1.81  | <0.001 | 0.020  |
| <a href="#">MEIOTIC_RECOMBINATION</a>                | -1.79                                                                                 | <0.001 | 0.021  |        |
| <a href="#">SIGNALING_BY_RHO_GTPASES</a>             | -1.78                                                                                 | <0.001 | 0.022  |        |
| <a href="#">PI3K_AKT_ACTIVATION</a>                  | -1.78                                                                                 | 0.006  | 0.021  |        |
| <a href="#">PI3K_EVENTS_IN_ERBB4_SIGNALING</a>       | -1.77                                                                                 | 0.002  | 0.024  |        |
| Signaling pathway targets**<br>(MSigDB, C6 category) | <a href="#">KRAS.300_UP.V1_UP</a>                                                     | -1.90  | <0.001 | 0.001  |
|                                                      | <a href="#">STK33_NOMO_UP</a>                                                         | -1.85  | <0.001 | 0.002  |
|                                                      | <a href="#">TGFB_UP.V1_UP</a>                                                         | -1.85  | <0.001 | 0.002  |
|                                                      | <a href="#">KRAS.600.LUNG.BREAST_UP.V1_UP</a>                                         | -1.81  | <0.001 | 0.002  |
|                                                      | <a href="#">KRAS.600_UP.V1_UP</a>                                                     | -1.81  | <0.001 | 0.002  |
|                                                      | <a href="#">STK33_UP</a>                                                              | -1.79  | <0.001 | 0.001  |
|                                                      | <a href="#">ESC_V6.5_UP_EARLY.V1_UP</a>                                               | -1.67  | <0.001 | 0.006  |

|                                                                             |                                               |                                                   |                                                        |        |        |        |
|-----------------------------------------------------------------------------|-----------------------------------------------|---------------------------------------------------|--------------------------------------------------------|--------|--------|--------|
| uXBP1                                                                       | Hallmark<br>(curated transcriptional targets) | <a href="#">KRAS.LUNG.BREAST_UP.V1_UP</a>         | -1.66                                                  | <0.001 | 0.006  |        |
|                                                                             |                                               | <a href="#">STK33_SKM_UP</a>                      | -1.63                                                  | <0.001 | 0.008  |        |
|                                                                             |                                               | <a href="#">SINGH_KRAS_DEPENDENCY_SIGNATURE</a>   | -1.60                                                  | 0.018  | 0.009  |        |
|                                                                             |                                               | <a href="#">EPITHELIAL_MESENCHYMAL_TRANSITION</a> | 2.38                                                   | <0.001 | <0.001 |        |
|                                                                             |                                               | <a href="#">MTORC1_SIGNALING</a>                  | 2.15                                                   | <0.001 | <0.001 |        |
|                                                                             |                                               | <a href="#">UNFOLDED_PROTEIN_RESPONSE</a>         | 1.99                                                   | <0.001 | <0.001 |        |
|                                                                             |                                               | <a href="#">PROTEIN_SECRETION</a>                 | 1.99                                                   | <0.001 | <0.001 |        |
|                                                                             |                                               | <a href="#">OXIDATIVE_PHOSPHORYLATION</a>         | 1.84                                                   | <0.001 | 0.001  |        |
|                                                                             |                                               | <a href="#">HYPOXIA</a>                           | 1.83                                                   | <0.001 | 0.001  |        |
|                                                                             |                                               | <a href="#">GLYCOLYSIS</a>                        | 1.79                                                   | <0.001 | 0.002  |        |
|                                                                             |                                               | <a href="#">FATTY_ACID_METABOLISM</a>             | 1.76                                                   | <0.001 | 0.002  |        |
|                                                                             |                                               | <a href="#">MYOGENESIS</a>                        | 1.71                                                   | <0.001 | 0.003  |        |
|                                                                             |                                               | <a href="#">MYC_TARGETS_V2</a>                    | 1.69                                                   | 0.002  | 0.003  |        |
|                                                                             |                                               | <a href="#">ANGIOGENESIS</a>                      | 1.67                                                   | 0.006  | 0.003  |        |
|                                                                             |                                               | <a href="#">MYC_TARGETS_V1</a>                    | 1.66                                                   | <0.001 | 0.003  |        |
|                                                                             |                                               | <a href="#">APICAL_JUNCTION</a>                   | 1.61                                                   | <0.001 | 0.005  |        |
|                                                                             |                                               | <a href="#">XENOBIOTIC_METABOLISM</a>             | 1.59                                                   | <0.001 | 0.006  |        |
|                                                                             |                                               | <a href="#">UV_RESPONSE_DN</a>                    | 1.58                                                   | 0.004  | 0.006  |        |
|                                                                             |                                               | <a href="#">REACTIVE_OXIGEN_SPECIES_PATHWAY</a>   | 1.56                                                   | 0.014  | 0.007  |        |
|                                                                             |                                               | <a href="#">ADIPOGENESIS</a>                      | 1.55                                                   | <0.001 | 0.007  |        |
|                                                                             |                                               | <a href="#">CHOLESTEROL_HOMEOSTASIS</a>           | 1.49                                                   | 0.008  | 0.013  |        |
|                                                                             |                                               | Reactome<br>(curated pathway members)             | <a href="#">COLLAGEN_FORMATION</a>                     | 2.59   | <0.001 | <0.001 |
|                                                                             |                                               |                                                   | <a href="#">ACTIVATION_OF_CHAPERONE_GENES_BY_XBP1S</a> | 2.21   | <0.001 | <0.001 |
|                                                                             |                                               |                                                   | <a href="#">SPHINGOLIPID_METABOLISM</a>                | 2.18   | <0.001 | <0.001 |
|                                                                             |                                               |                                                   | <a href="#">METABOLISM_OF_PROTEINS</a>                 | 2.15   | <0.001 | <0.001 |
| <a href="#">EXTRACELLULAR_MATRIX_ORGANIZATION</a>                           | 2.14                                          |                                                   | <0.001                                                 | <0.001 |        |        |
| <a href="#">UNFOLDED_PROTEIN_RESPONSE</a>                                   | 2.06                                          |                                                   | <0.001                                                 | 0.001  |        |        |
| <a href="#">TRANSLATION</a>                                                 | 2.04                                          |                                                   | <0.001                                                 | 0.001  |        |        |
| <a href="#">ASPARAGINE_N_LINKED_GLYCOSYLATION</a>                           | 2.04                                          |                                                   | <0.001                                                 | 0.001  |        |        |
| <a href="#">POST_TRANSLATIONAL_PROTEIN_MODIFICATION</a>                     | 2.02                                          |                                                   | <0.001                                                 | 0.002  |        |        |
| <a href="#">SPHINGOLIPID_DE_NOVO_BIOSYNTHESIS</a>                           | 1.98                                          |                                                   | 0.002                                                  | 0.003  |        |        |
| <a href="#">SRP_DEPENDENT_COTRANSLATIONAL_PROTEIN_TARGETING_TO_MEMBRANE</a> | 1.96                                          |                                                   | <0.001                                                 | 0.004  |        |        |
| <a href="#">GLYCOSPHINGOLIPID_METABOLISM</a>                                | 1.93                                          |                                                   | 0.002                                                  | 0.006  |        |        |
| <a href="#">LYSOSOME_VESICLE_BIOGENESIS</a>                                 | 1.84                                          |                                                   | 0.002                                                  | 0.020  |        |        |
| <a href="#">MEMBRANE_TRAFFICKING</a>                                        | 1.84                                          |                                                   | <0.001                                                 | 0.019  |        |        |
| <a href="#">RESPONSE_TO_ELEVATED_PLATELET_CYTOSOLIC_CA2</a>                 | 1.84                                          |                                                   | <0.001                                                 | 0.018  |        |        |
| <a href="#">TRANS_GOLGI_NETWORK_VESICLE_BUDDING</a>                         | 1.79                                          | <0.001                                            | 0.032                                                  |        |        |        |



|                        |                                                      |                                                                                       |       |        |        |
|------------------------|------------------------------------------------------|---------------------------------------------------------------------------------------|-------|--------|--------|
|                        |                                                      | <a href="#">ZINC TRANSPORTERS</a>                                                     | 1.79  | 0.004  | 0.032  |
|                        |                                                      | <a href="#">DIABETES PATHWAYS</a>                                                     | 1.78  | <0.001 | 0.030  |
|                        |                                                      | <a href="#">PHOSPHOLIPID METABOLISM</a>                                               | 1.78  | <0.001 | 0.030  |
|                        |                                                      | <a href="#">TRANSFERRIN ENDOCYTOSIS AND RECYCLING</a>                                 | 1.78  | <0.001 | 0.029  |
|                        | Signaling pathway targets**<br>(MSigDB, C6 category) | <a href="#">CORDENONSI YAP CONSERVED SIGNATURE</a>                                    | 1.75  | 0.004  | 0.022  |
|                        |                                                      | <a href="#">ERB2_UP.V1_UP</a>                                                         | 1.67  | <0.001 | 0.018  |
|                        |                                                      | <a href="#">NFE2L2.V2</a>                                                             | 1.57  | <0.001 | 0.034  |
|                        |                                                      | <a href="#">MTOR_UP.N4.V1_UP</a>                                                      | 1.54  | 0.004  | 0.037  |
|                        |                                                      | <a href="#">SIRNA_EIF4GI_UP</a>                                                       | 1.54  | 0.004  | 0.035  |
|                        |                                                      | <a href="#">ESC_J1_UP_LATE.V1_UP</a>                                                  | 1.51  | <0.001 | 0.035  |
|                        |                                                      | <a href="#">CAMP_UP.V1_UP</a>                                                         | 1.48  | <0.001 | 0.032  |
| Control<br>(vs. uXBP1) | Hallmark<br>(curated transcriptional targets)        | <a href="#">INTERFERON ALPHA RESPONSE</a>                                             | -2.47 | <0.001 | <0.001 |
|                        |                                                      | <a href="#">TNFA_SIGNALING_VIA_NFKB</a>                                               | -2.41 | <0.001 | <0.001 |
|                        |                                                      | <a href="#">INTERFERON GAMMA RESPONSE</a>                                             | -2.25 | <0.001 | <0.001 |
|                        |                                                      | <a href="#">KRAS_SIGNALING_UP</a>                                                     | -2.03 | <0.001 | <0.001 |
|                        |                                                      | <a href="#">INFLAMMATORY_RESPONSE</a>                                                 | -1.87 | <0.001 | 0.001  |
|                        |                                                      | <a href="#">TGF_BETA_SIGNALING</a>                                                    | -1.72 | 0.002  | 0.003  |
|                        |                                                      | <a href="#">P53_PATHWAY</a>                                                           | -1.68 | <0.001 | 0.003  |
|                        |                                                      | <a href="#">APOPTOSIS</a>                                                             | -1.65 | <0.001 | 0.004  |
|                        |                                                      | <a href="#">COMPLEMENT</a>                                                            | -1.54 | <0.001 | 0.011  |
|                        |                                                      | <a href="#">IL6_JAK_STAT3_SIGNALING</a>                                               | -1.54 | 0.008  | 0.010  |
|                        |                                                      | <a href="#">ALLOGRAFT_REJECTION</a>                                                   | -1.51 | 0.004  | 0.013  |
|                        |                                                      | <a href="#">WNT_BETA_CATENIN_SIGNALING</a>                                            | -1.44 | 0.021  | 0.026  |
|                        | Reactome<br>(curated pathway members)                | <a href="#">INTERFERON GAMMA SIGNALING</a>                                            | -2.21 | <0.001 | <0.001 |
|                        |                                                      | <a href="#">CYTOKINE_SIGNALING_IN_IMMUNE_SYSTEM</a>                                   | -2.11 | <0.001 | 0.002  |
|                        |                                                      | <a href="#">INTERFERON_SIGNALING</a>                                                  | -2.09 | <0.001 | 0.002  |
|                        |                                                      | <a href="#">PACKAGING_OF_TELOMERE_ENDS</a>                                            | -2.04 | <0.001 | 0.003  |
|                        |                                                      | <a href="#">RNA_POL_I_TRANSCRIPTION</a>                                               | -2.04 | <0.001 | 0.003  |
|                        |                                                      | <a href="#">DEPOSITION_OF_NEW_CENPA_CONTAINING_NUCLEOSOMES_AT_THE_CENTROMERE</a>      | -2.02 | <0.001 | 0.003  |
|                        |                                                      | <a href="#">RNA_POL_I_PROMOTER_OPENING</a>                                            | -2.01 | <0.001 | 0.003  |
|                        |                                                      | <a href="#">MEIOTIC_RECOMBINATION</a>                                                 | -1.98 | <0.001 | 0.004  |
|                        |                                                      | <a href="#">TRAF6_MEDIATED_IRF7_ACTIVATION</a>                                        | -1.93 | <0.001 | 0.007  |
|                        |                                                      | <a href="#">AMYLOIDS</a>                                                              | -1.90 | <0.001 | 0.011  |
|                        |                                                      | <a href="#">FACTORS_INVOLVED_IN_MEGAKARYOCYTE_DEVELOPMENT_AND_PLATELET_PRODUCTION</a> | -1.89 | <0.001 | 0.011  |
|                        |                                                      | <a href="#">INTERFERON_ALPHA_BETA_SIGNALING</a>                                       | -1.86 | <0.001 | 0.015  |
|                        |                                                      | <a href="#">CIRCADIAN_REPRESSION_OF_EXPRESSION_BY_REV_ERBA</a>                        | -1.85 | <0.001 | 0.017  |

|                                                      |                                                                                                               |       |        |        |
|------------------------------------------------------|---------------------------------------------------------------------------------------------------------------|-------|--------|--------|
|                                                      | <a href="#">MEIOSIS</a>                                                                                       | -1.84 | <0.001 | 0.017  |
|                                                      | <a href="#">RNA_POL_I_RNA_POL_III_AND_MITOCHONDRIAL_TRANSCRIPTIO<br/>N</a>                                    | -1.82 | <0.001 | 0.020  |
|                                                      | <a href="#">MEIOTIC_SYNAPSIS</a>                                                                              | -1.81 | <0.001 | 0.020  |
|                                                      | <a href="#">NUCLEOTIDE_BINDING_DOMAIN_LEUCINE_RICH_REPEAT_CONT<br/>AINING_RECEPTOR_NLR_SIGNALING_PATHWAYS</a> | -1.79 | <0.001 | 0.023  |
|                                                      | <a href="#">BMAL1_CLOCK_NPAS2_ACTIVATES_CIRCADIAN_EXPRESSION</a>                                              | -1.78 | <0.001 | 0.025  |
|                                                      | <a href="#">NUCLEAR_SIGNALING_BY_ERBB4</a>                                                                    | -1.78 | 0.004  | 0.025  |
|                                                      | <a href="#">TRANSCRIPTIONAL_REGULATION_OF_WHITE_ADIPOCYTE_DIFFE<br/>RENTIATION</a>                            | -1.78 | 0.002  | 0.024  |
| Transcription factor targets*                        | <a href="#">IRF_Q6</a>                                                                                        | -1.95 | <0.001 | 0.001  |
|                                                      | <a href="#">ISRE_01</a>                                                                                       | -1.86 | <0.001 | 0.009  |
|                                                      | <a href="#">NFKB_Q6_01</a>                                                                                    | -1.77 | <0.001 | 0.017  |
|                                                      | <a href="#">PR_02</a>                                                                                         | -1.76 | <0.001 | 0.014  |
|                                                      | <a href="#">MZF1_02</a>                                                                                       | -1.74 | <0.001 | 0.014  |
|                                                      | <a href="#">ICSBP_Q6</a>                                                                                      | -1.73 | <0.001 | 0.013  |
|                                                      | <a href="#">AR_03</a>                                                                                         | -1.72 | 0.004  | 0.013  |
|                                                      | <a href="#">NFKB_C</a>                                                                                        | -1.69 | <0.001 | 0.019  |
|                                                      | <a href="#">STTTTCRNTTT_IRF_Q6</a>                                                                            | -1.68 | <0.001 | 0.020  |
|                                                      | <a href="#">NFKB_Q6</a>                                                                                       | -1.68 | <0.001 | 0.019  |
|                                                      | <a href="#">CDP_01</a>                                                                                        | -1.65 | <0.001 | 0.022  |
|                                                      | <a href="#">NGFIC_01</a>                                                                                      | -1.64 | <0.001 | 0.023  |
|                                                      | <a href="#">NFKAPPAB65_01</a>                                                                                 | -1.63 | <0.001 | 0.023  |
|                                                      | <a href="#">CEBP_C</a>                                                                                        | -1.61 | <0.001 | 0.026  |
|                                                      | <a href="#">ETF_Q6</a>                                                                                        | -1.61 | <0.001 | 0.025  |
|                                                      | <a href="#">IRF2_01</a>                                                                                       | -1.59 | <0.001 | 0.028  |
| Signaling pathway targets**<br>(MSigDB, C6 category) | <a href="#">KRAS.600.LUNG.BREAST_UP.V1_UP</a>                                                                 | -2.05 | <0.001 | <0.001 |
|                                                      | <a href="#">KRAS.300_UP.V1_UP</a>                                                                             | -2.04 | <0.001 | <0.001 |
|                                                      | <a href="#">KRAS.LUNG.BREAST_UP.V1_UP</a>                                                                     | -2.00 | <0.001 | <0.001 |
|                                                      | <a href="#">STK33_NOMO_UP</a>                                                                                 | -1.84 | <0.001 | 0.002  |
|                                                      | <a href="#">KRAS.600_UP.V1_UP</a>                                                                             | -1.81 | <0.001 | 0.002  |
|                                                      | <a href="#">STK33_UP</a>                                                                                      | -1.79 | <0.001 | 0.002  |
|                                                      | <a href="#">KRAS.BREAST_UP.V1_UP</a>                                                                          | -1.77 | <0.001 | 0.003  |
|                                                      | <a href="#">KRAS.LUNG_UP.V1_UP</a>                                                                            | -1.71 | <0.001 | 0.004  |
|                                                      | <a href="#">KRAS.DF.V1_UP</a>                                                                                 | -1.65 | <0.001 | 0.007  |
|                                                      | <a href="#">KRAS.50_UP.V1_UP</a>                                                                              | -1.64 | 0.002  | 0.007  |
|                                                      | <a href="#">STK33_SKM_UP</a>                                                                                  | -1.56 | 0.002  | 0.017  |
|                                                      | <a href="#">SINGH_KRAS_DEPENDENCY_SIGNATURE</a>                                                               | -1.56 | 0.032  | 0.016  |

[CSR\\_EARLY\\_UP.V1\\_UP](#)

-1.51 <0.001 0.025

---

\*Sequence motifs with known transcription factor are shown.

\*\*Upregulated target gene sets in response to pathway activation are shown.

FDR: false discovery rate, NES: normalized enrichment score.

Gene sets were obtained from Molecular Signature Database (MSigDB) ([www.broadinstitute.org/msigdb](http://www.broadinstitute.org/msigdb)).

**Supplementary Table 4**

XBP1 target gene signature.

| Overexpressed in | Entrez Gene ID | Gene symbol  |
|------------------|----------------|--------------|
| sXBP1            | 10954          | PDIA5        |
|                  | 51569          | UFM1         |
|                  | 151887         | CCDC80       |
|                  | 55829          | SELS         |
|                  | 29100          | TMEM208      |
|                  | 1346           | COX7A1       |
|                  | 115701         | ALPK2        |
|                  | 56922          | MCCC1        |
|                  | 55076          | TMEM45A      |
|                  | 90411          | MCFD2        |
|                  | 164781         | WDR69        |
|                  | 8544           | PIR          |
|                  | 1300           | COL10A1      |
|                  | 100128892      | LOC100128892 |
|                  | 728495         | FAM74A3      |
|                  | 10058          | ABCB6        |
|                  | 93953          | ACRC         |
|                  | 55974          | RAG1AP1      |
|                  | 160428         | ALDH1L2      |
|                  | 1013           | CDH15        |
|                  | 55605          | KIF21A       |
|                  | 3486           | IGFBP3       |
|                  | 9871           | SEC24D       |
|                  | 10897          | YIF1A        |
|                  | 10717          | AP4B1        |
|                  | 590            | BCHE         |
|                  | 58515          | SELK         |
|                  | 29100          | HSPC171      |
|                  | 2053           | EPHX2        |
|                  | 4015           | LOX          |
|                  | 79947          | DHDDS        |

| Overexpressed in    | Entrez Gene ID | Gene symbol  |
|---------------------|----------------|--------------|
| Control (vs. sXBP1) | 1906           | EDN1         |
|                     | 6876           | TAGLN        |
|                     | 5327           | PLAT         |
|                     | 441951         | C20orf199    |
|                     | 10855          | HPSE         |
|                     | 400759         | LOC400759    |
|                     | 25976          | TIPARP       |
|                     | 153222         | C5orf41      |
|                     | 1958           | EGR1         |
|                     | 5328           | PLAU         |
|                     | 4487           | MSX1         |
|                     | 10019          | SH2B3        |
|                     | 55450          | CAMK2N1      |
|                     | 125050         | RN7SK        |
|                     | 1316           | KLF6         |
|                     | 2633           | GBP1         |
|                     | 1848           | DUSP6        |
|                     | 56978          | PRDM8        |
|                     | 9518           | GDF15        |
|                     | 114801         | TMEM200A     |
|                     | 2114           | ETS2         |
|                     | 55711          | FAR2         |
|                     | 5764           | PTN          |
|                     | 114548         | NLRP3        |
|                     | 730249         | IRG1         |
|                     | 100134073      | LOC100134073 |
|                     | 1839           | HBEGF        |
|                     | 282618         | IL29         |
|                     | 730249         | LOC730249    |
|                     | 100133034      | LOC100133034 |
|                     | 84941          | HSH2D        |

|           |              |        |          |
|-----------|--------------|--------|----------|
| 401508    | FLJ45202     | 6373   | CXCL11   |
| 55840     | EAF2         | 115361 | GBP4     |
| 56521     | DNAJC12      | 51191  | HERC5    |
| 255520    | ELMOD2       | 3456   | IFNB1    |
| 100131785 | LOC100131785 | 4061   | LY6E     |
| 728324    | LOC728324    | 116372 | LYPD1    |
| 121457    | IKBIP        | 93082  | LINCR    |
| 1842      | ECM2         | 8911   | CACNA1I  |
| 1289      | COL5A1       | 57664  | PLEKHA4  |
| 645345    | CHCHD9       | 9353   | SLIT2    |
| 4189      | DNAJB9       | 259307 | IL4I1    |
| 11153     | FICD         | 3627   | CXCL10   |
| 79586     | CHPF         | 118429 | ANTXR2   |
| 6723      | SRM          | 51251  | NT5C3    |
| 57535     | KIAA1324     | 2621   | GAS6     |
| 79174     | CRELD2       | 23645  | PPP1R15A |
| 51009     | DERL2        | 834    | CASP1    |
| 64116     | SLC39A8      | 2828   | GPR4     |
| 5226      | PGD          | 8743   | TNFSF10  |
| 202459    | OSTCL        | 344148 | NCKAP5   |
| 22998     | LIMCH1       | 7185   | TRAF1    |
| 6038      | RNASE4       | 142679 | DUSP19   |
| 90522     | YIF1B        | 10468  | FST      |
| 55033     | FKBP14       | 220    | ALDH1A3  |
| 1277      | COL1A1       | 54979  | HRASLS2  |
| 84513     | PPAPDC1B     | 3142   | HLX      |
| 9060      | PAPSS2       | 81030  | ZBP1     |
| 5961      | PRPH2        | 114793 | FMNL2    |
| 2330      | FMO5         | 4321   | MMP12    |
| 646567    | LOC646567    | 643427 | RBMS2P   |
| 27090     | ST6GALNAC4   | 92241  | RCSD1    |
| 654174    | LOC654174    | 3790   | KCNS3    |
| 51651     | PTRH2        | 11082  | ESM1     |
| 10300     | KATNB1       | 3487   | IGFBP4   |
| 157317    | CYCSL1       | 2040   | STOM     |

|       |           |              |                     |            |
|-------|-----------|--------------|---------------------|------------|
|       | 283       | ANG          | 6352                | CCL5       |
|       | 80328     | ULBP2        | 80176               | SPSB1      |
|       | 58477     | SRPRB        | 23387               | SIK3       |
|       | 10609     | SC65         | 6349                | CCL3L1     |
|       | 9424      | KCNK6        | 3087                | HHEX       |
|       | 6748      | SSR4         | 5939                | RBMS2      |
|       | 5238      | PGM3         | 10544               | PROCR      |
|       | 23753     | SDF2L1       | 7508                | XPC        |
|       | 10567     | RABAC1       | 4005                | LMO2       |
|       | 340542    | BEX5         | 11221               | DUSP10     |
|       | 51726     | DNAJB11      | 114915              | NCRNA00219 |
|       | 55002     | TMCO3        | 3732                | CD82       |
|       | 29995     | LMCD1        | 135112              | NCOA7      |
|       | 10525     | HYOU1        | 290                 | ANPEP      |
|       | 81031     | SLC2A10      | 7980                | TFPI2      |
|       | 90701     | SEC11C       | 50650               | ARHGEF3    |
|       | 51136     | RNFT1        | 80019               | UBTD1      |
|       | 100134537 | LOC100134537 | 623                 | BDKRB1     |
|       | 26003     | GORASP2      | 414062              | CCL3L3     |
|       | 57016     | AKR1B10      | 4314                | MMP3       |
|       | 343477    | TRA1P2       | 79971               | GPR177     |
|       | 378       | ARF4         | 11033               | CENTA1     |
|       | 10113     | PREB         | 8325                | FZD8       |
|       | 3703      | STT3A        | 149111              | CNIH3      |
|       | 84561     | SLC12A8      | 2697                | GJA1       |
|       | 11015     | KDELR3       | 8877                | SPHK1      |
|       | 516       | ATP5G1       | 10253               | SPRY2      |
|       | 7466      | WFS1         | 55691               | FRMD4A     |
|       | 58505     | OSTC         | 81622               | UNC93B1    |
|       | 138162    | C9orf116     | 3134                | HLA-F      |
|       | 55741     | EDEM2        | 10437               | IFI30      |
|       | 7184      | HSP90B1      | 22822               | PHLDA1     |
|       | 7873      | ARMET        | 8334                | HIST1H2AC  |
|       | 10263     | CDK2AP2      | 595                 | CCND1      |
| uXBP1 | 6447      | SCG5         | Control (vs. uXBP1) | 27128      |
|       |           |              |                     | PSCD4      |

|           |              |           |              |
|-----------|--------------|-----------|--------------|
| 54928     | IMPAD1       | 9076      | CLDN1        |
| 284029    | C17orf44     | 10855     | HPSE         |
| 84624     | FNDC1        | 1839      | HBEGF        |
| 2202      | EFEMP1       | 10113     | PREB         |
| 126393    | HSPB6        | 400759    | LOC400759    |
| 64798     | DEPDC6       | 92241     | RCSD1        |
| 79751     | SLC25A22     | 441951    | C20orf199    |
| 9645      | MICAL2       | 1440      | CSF3         |
| 160428    | ALDH1L2      | 730249    | IRG1         |
| 10263     | CDK2AP2      | 3866      | KRT15        |
| 9114      | ATP6V0D1     | 282618    | IL29         |
| 10516     | FBLN5        | 730249    | LOC730249    |
| 5021      | OXTR         | 3598      | IL13RA2      |
| 202459    | OSTCL        | 9518      | GDF15        |
| 10272     | FSTL3        | 7185      | TRAF1        |
| 654174    | LOC654174    | 93082     | LINCR        |
| 10058     | ABCB6        | 6373      | CXCL11       |
| 340542    | BEX5         | 84941     | HSH2D        |
| 8076      | MFAP5        | 89795     | NAV3         |
| 338773    | TMEM119      | 4321      | MMP12        |
| 166929    | SGMS2        | 1316      | KLF6         |
| 9531      | BAG3         | 1848      | DUSP6        |
| 8544      | PIR          | 220       | ALDH1A3      |
| 1404      | HAPLN1       | 54979     | HRASLS2      |
| 7873      | ARMET        | 7980      | TFPI2        |
| 4642      | MYO1D        | 5328      | PLAU         |
| 22801     | ITGA11       | 10019     | SH2B3        |
| 55076     | TMEM45A      | 11082     | ESM1         |
| 84898     | PLXDC2       | 8911      | CACNA1I      |
| 100134537 | LOC100134537 | 100133034 | LOC100133034 |
| 646567    | LOC646567    | 10060     | ABCC9        |
| 58515     | SELK         | 27128     | CYTH4        |
| 1490      | CTGF         | 6352      | CCL5         |
| 2191      | FAP          | 330       | BIRC3        |
| 10924     | SMPDL3A      | 4487      | MSX1         |

|           |              |        |          |
|-----------|--------------|--------|----------|
| 54575     | UGT1A10      | 56978  | PRDM8    |
| 389336    | C5orf46      | 51251  | NT5C3    |
| 57214     | KIAA1199     | 25976  | TIPARP   |
| 728324    | LOC728324    | 3456   | IFNB1    |
| 1842      | ECM2         | 441525 | SPANXN4  |
| 7373      | COL14A1      | 4314   | MMP3     |
| 26003     | GORASP2      | 142679 | DUSP19   |
| 6356      | CCL11        | 2633   | GBP1     |
| 1300      | COL10A1      | 2828   | GPR4     |
| 871       | SERPINH1     | 2330   | FMO5     |
| 343477    | TRA1P2       | 352999 | C6orf58  |
| 10717     | AP4B1        | 23645  | PPP1R15A |
| 56521     | DNAJC12      | 153222 | C5orf41  |
| 121457    | IKBIP        | 81030  | ZBP1     |
| 10897     | YIF1A        | 8743   | TNFSF10  |
| 6876      | TAGLN        | 114793 | FMNL2    |
| 64175     | LEPRE1       | 6781   | STC1     |
| 79174     | CRELD2       | 8325   | FZD8     |
| 4015      | LOX          | 5764   | PTN      |
| 151887    | CCDC80       | 10253  | SPRY2    |
| 100128892 | LOC100128892 | 2114   | ETS2     |
| 23753     | SDF2L1       | 623    | BDKRB1   |
| 90522     | YIF1B        | 259307 | IL4I1    |
| 728495    | FAM74A3      | 8942   | KYNU     |
| 157317    | CYCSL1       | 90865  | IL33     |
| 57016     | AKR1B10      | 3087   | HHEX     |
| 115701    | ALPK2        | 135112 | NCOA7    |
| 55840     | EAF2         | 79670  | ZCCHC6   |
| 5226      | PGD          | 11009  | IL24     |
| 3486      | IGFBP3       | 114548 | NLRP3    |
| 9424      | KCNK6        | 1958   | EGR1     |
| 58477     | SRPRB        | 10437  | IFI30    |
| 9060      | PAPSS2       | 3656   | IRAK2    |
| 1277      | COL1A1       | 27075  | TSPAN13  |
| 84886     | C1orf198     | 3627   | CXCL10   |



|           |              |           |              |
|-----------|--------------|-----------|--------------|
| 590       | BCHE         | 134285    | TMEM171      |
| 3703      | STT3A        | 22822     | PHLDA1       |
| 55605     | KIF21A       | 3142      | HLX          |
| 51726     | DNAJB11      | 643427    | RBMS2P       |
| 6038      | RNASE4       | 3620      | INDO         |
| 1289      | COL5A1       | 115361    | GBP4         |
| 378       | ARF4         | 30014     | SPANXA1      |
| 100131785 | LOC100131785 | 10903     | MTMR11       |
| 9915      | ARNT2        | 3620      | IDO1         |
| 283       | ANG          | 100133171 | LOC100133171 |
| 64116     | SLC39A8      | 5743      | PTGS2        |
| 58505     | OSTC         | 55711     | FAR2         |
| 10525     | HYOU1        | 80176     | SPSB1        |
| 27090     | ST6GALNAC4   | 8767      | RIPK2        |
| 9891      | NUAK1        | 8334      | HIST1H2AC    |
| 645345    | CHCHD9       | 4005      | LMO2         |
| 10609     | SC65         | 220323    | OAF          |
| 84561     | SLC12A8      | 290       | ANPEP        |
| 29995     | LMCD1        | 7128      | TNFAIP3      |
| 10300     | KATNB1       | 6948      | TCN2         |
| 401508    | FLJ45202     | 11174     | ADAMTS6      |
| 57535     | KIAA1324     | 2635      | GBP3         |
| 138162    | C9orf116     | 3732      | CD82         |
| 55002     | TMCO3        | 27284     | SULT1B1      |
| 22998     | LIMCH1       | 629       | CFB          |
| 11015     | KDELR3       | 57664     | PLEKHA4      |
| 7466      | WFS1         | 118429    | ANTXR2       |
| 51136     | RNFT1        | 6354      | CCL7         |
| 7184      | HSP90B1      | 441024    | MTHFD2L      |

---

---

**Supplementary Table 5**

Transcriptome datasets used for assessment of XBP1 target gene signatures.

| Species | Intervention/disease                 | Sample type | Accession number* |
|---------|--------------------------------------|-------------|-------------------|
| Mouse   | Carbon tetrachloride (CCI4)          | Primary HSC | GSE34640          |
|         | Bile duct ligation (BDL)             | Primary HSC | GSE34640          |
|         | Culture activated                    | Primary HSC | GSE34640          |
| Mouse   | High fat diet (HFD) with cholesterol | Tissue      | GSE40481          |
| Human   | Healthy obese, NAFLD, NASH           | Tissue      | GSE61260          |
|         | Advanced NASH                        | Tissue      | GSE49541          |

\*NCBI Gene Expression Omnibus (GEO) database accession number.

HSC: hepatic stellate cell.
